# Supplementary material for: Ultra-robust, high-adhesive, self-healing, and photothermal zwitterionic hydrogels for multi-sensory applications and solar-driven evaporation
Source: Royal Society of Chemistry journal article supplement (doi:10.1039/d3mh00629h), 2023-01-01
Supplement: d3mh00629h1.pdf [file d3mh00629h1.pdf]

# Supporting Information

## Ultra-robust, High-adhesive, Self-healing, and Photothermal Zwitterionic Hydrogels toward Multi-sensory Application and Solar-Driven Evaporation

Youyou Chen<sup>1,2,3</sup>, Chen Zhang<sup>2,3\*</sup>, Rui Yin<sup>2,3</sup>, Minghan Yu<sup>2,3</sup>, Yijie Liu<sup>4</sup>, Yaming Liu<sup>1,2,3</sup>, Haoran Wang<sup>2,3</sup>, Feihua Liu<sup>2,3</sup>, Feng Cao<sup>4</sup>, Guoqing Chen<sup>1\*</sup>, and Weiwei Zhao<sup>1,2,3\*</sup>

<sup>1</sup> State Key Laboratory of Advanced Welding & Joining, Harbin Institute of Technology, Harbin 150001, People's Republic of China

<sup>2</sup> Sauvage Laboratory for Smart Materials, The School of Materials Science and Engineering, Harbin Institute of Technology (Shenzhen), Shenzhen 518055, People's Republic of China

<sup>3</sup> Shenzhen Key Laboratory of Flexible Printed Electronics Technology, Harbin Institute of Technology (Shenzhen), Shenzhen 518055, People's Republic of China

<sup>4</sup> School of Science, Harbin Institute of Technology (Shenzhen), Shenzhen 518055, People's Republic of China

\* Corresponding Author

E-mail: [zhangchen2020@hit.edu.cn](mailto:zhangchen2020@hit.edu.cn), [chenguoqing@hit.edu.cn](mailto:chenguoqing@hit.edu.cn), [wzhao@hit.edu.cn](mailto:wzhao@hit.edu.cn)

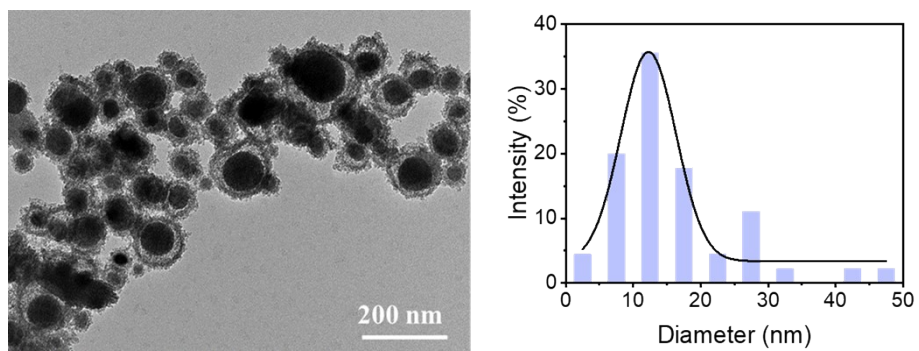

**Figure S1.** TEM image and diameter distribution of PDA shell thickness.

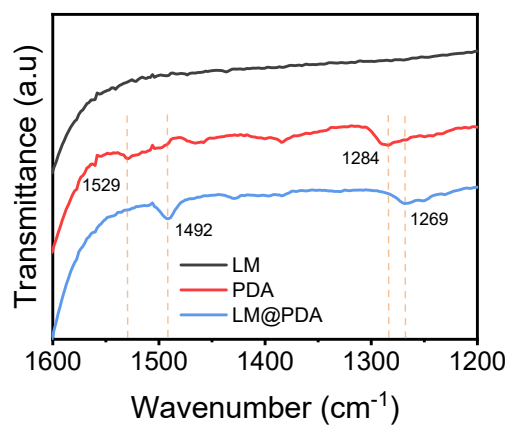

**Figure S2.** FTIR spectra of LM, PDA, and LM@PDA.

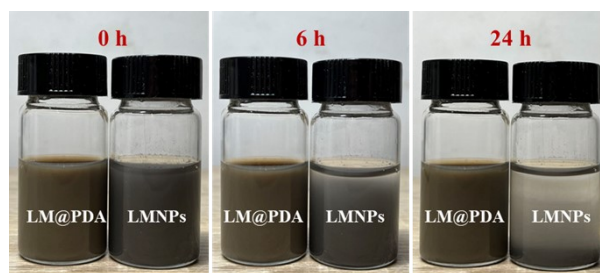

**Figure S3.** Time-dependent dispersion of LM@PDA after self-polymerization (left) and LMNPs in water after ultrasonication (right).

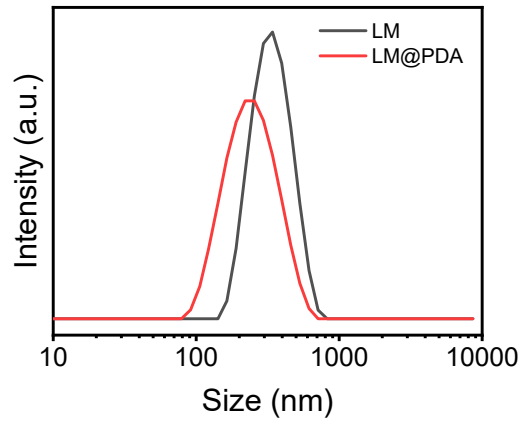

**Figure S4.** Size distributions of LM and LM@PDA.

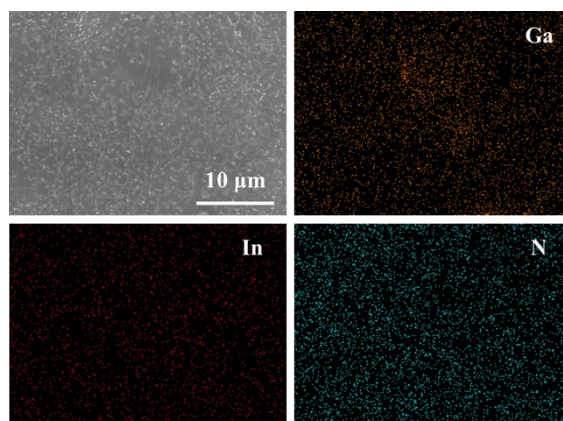

**Figure S5.** SEM image of the cross section of the freeze-dried PSBMA-LM@PDA hydrogel with corresponding elemental mapping by EDS.

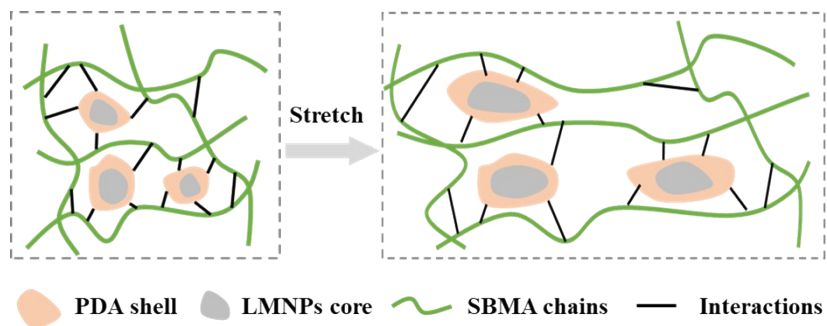

**Figure S6.** Illustration of PSBMA-LM@PDA hydrogels upon stretching.

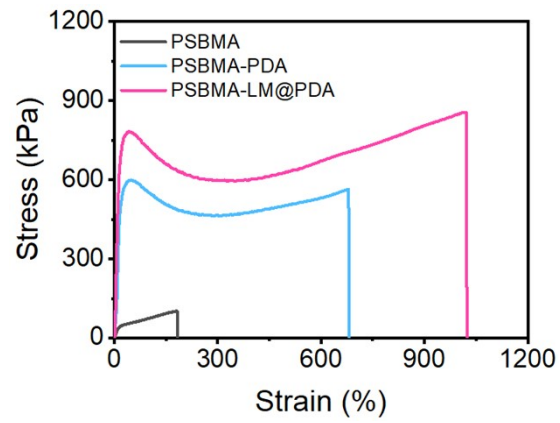

**Figure S7.** Tensile stress-strain curves of the pure PSBMA, PSBMA-PDA and PSBMA-LM@PDA hydrogels.



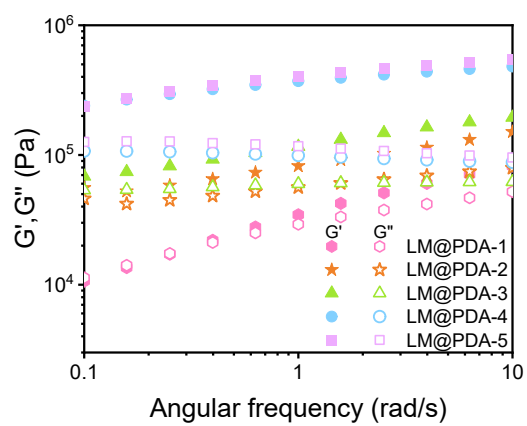

**Figure S8.** Frequency sweeps of PSBMA-LM@PDA hydrogels with different LM@PDA contents

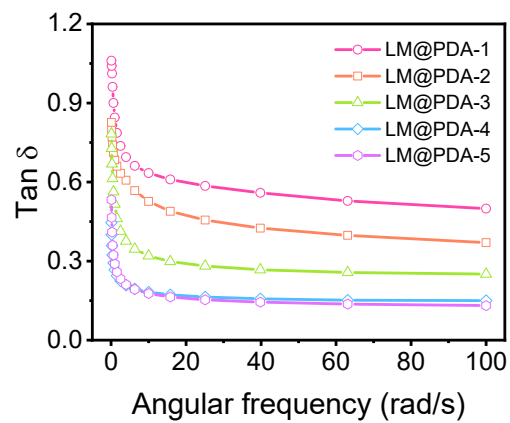

**Figure S9.**  $\tan \delta$  of PSBMA-LM@PDA hydrogels with different LM@PDA contents

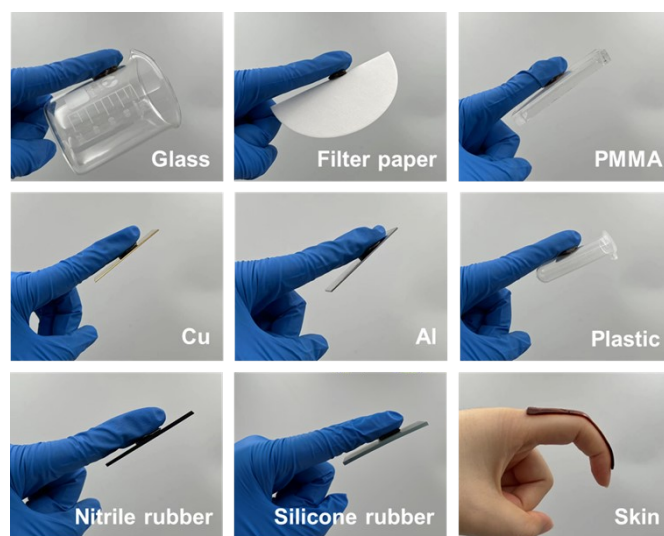

**Figure S10.** Photos of PSBMA-LM@PDA-5 hydrogel adhered on glass, filter paper, poly(methyl methacrylate) (PMMA), Cu, Al, plastic, nitrile rubber, silicone rubber, and human skin.

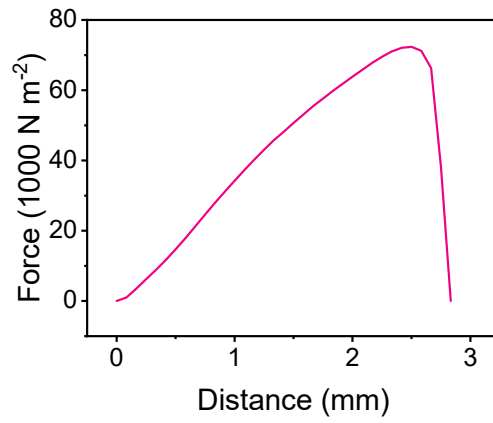

**Figure S11.** Lap shear curve of pure PSBMA hydrogel adhered on Al.

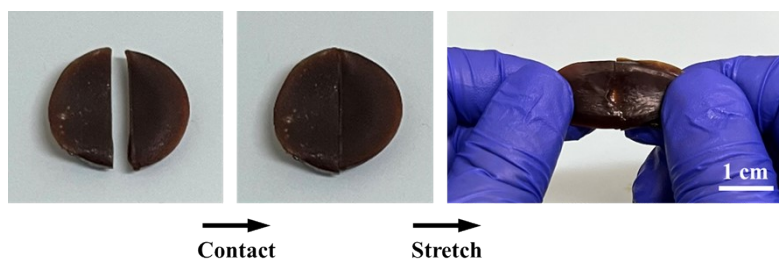

**Figure S12.** Optical images of two fractured hydrogel segments contact together and then under stretching.

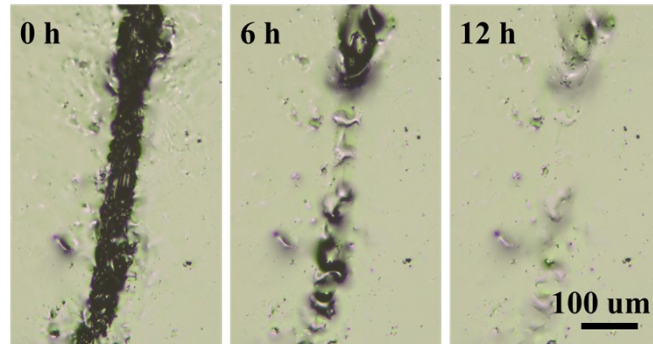

**Figure S13.** Self-healing process observed by an optical microscope. A crack autonomously disappeared after 12 h at room temperature.

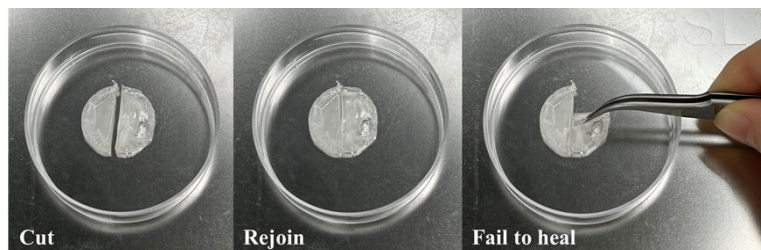

**Figure S14.** Optical images of two fractured PSBMA hydrogel segments contacted together and failed to heal.

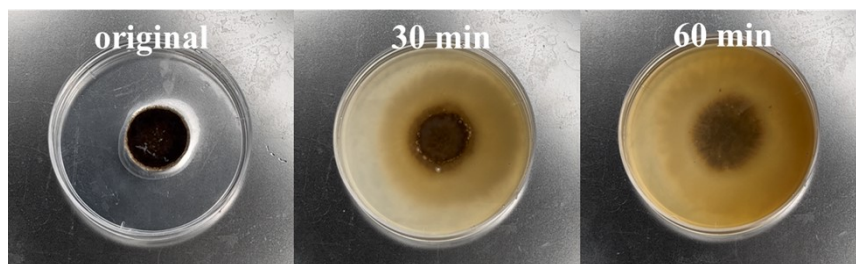

**Figure S15.** Photographs of the PSBMA-LM@PDA-5 hydrogel placed in water for different times.



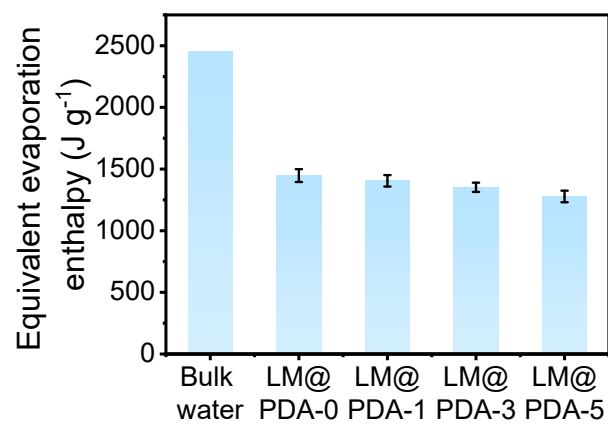

**Figure S16.** The water evaporation enthalpy of bulk water and water in PSBMA-LM@PDA-0, PSBMA-LM@PDA-1, PSBMA-LM@PDA-3, PSBMA-LM@PDA-5 hydrogels.

**Table S1.** Comparisons of PSBMA-LM@PDA hydrogels with those reported zwitterionic hydrogels in terms of tensile strength, strain, and toughness, respectively.

| Zwitterionic hydrogels           | Tensile strength (MPa) | Stain (%)    | Toughness (MJ/m <sup>3</sup> ) | REF              |
|----------------------------------|------------------------|--------------|--------------------------------|------------------|
| <b>PSBMA-LM@PDA-5</b>            | <b>1.30</b>            | <b>555.5</b> | <b>4.73</b>                    | <b>This work</b> |
| <b>PSBMA-LM@PDA-2</b>            | <b>0.69</b>            | <b>1343</b>  | <b>7.28</b>                    |                  |
| <b>PSBMA-LM@PDA-1</b>            | <b>0.44</b>            | <b>1555</b>  | <b>6.66</b>                    |                  |
| CS-P(AM-MPC-AA)-Fe <sup>3+</sup> | 1.07                   | 1075         | 7.03                           | [37]             |
| PCB/PSB                          | 1.00                   | 170          | —                              | [15]             |
| AMPS/SBAA                        | 0.91                   | 33.6         | —                              | [38]             |
| PSBMA/SA-Ca <sup>2+</sup>        | 0.73                   | 410          | —                              | [39]             |
| PCBAA/SA-Ca <sup>2+</sup>        | 0.69                   | 330          | —                              | [40]             |
| CNC@P(SBMA-co-AM)                | 0.61                   | 1250         | —                              | [41]             |
| Ca-GG/PAAm-ZP                    | 0.41                   | 1890         | 3.27                           | [42]             |
| PVA-P(SBMA-co-HEMA)-HCl          | 0.38                   | 337          | 0.52                           | [43]             |
| (pCBM/pSB)                       | 0.32                   | 225          | —                              | [44]             |
| PSBMA-Clay-LiCl                  | 0.30                   | 2200         | 5.48                           | [45]             |
| VBIPS                            | 0.20                   | 440          | 0.24                           | [46]             |
| PBA/CPA                          | 0.08                   | 1095         | 0.045                          | [47]             |
| PSBMA-NIPAAm-MPBA                | 70                     | 273          | —                              | [48]             |
| p(CBMA-co-HEMA)                  | 52                     | 532          | —                              | [49]             |

“—”: Not available or not mentioned in references.

**Table S2.** Comparison of performance parameters with various temperature sensors reported in the literature.

| <b>Material</b>                                      | <b>TCR (<math>^{\circ}\text{C}^{-1}</math>)</b> | <b>Temperature range (<math>^{\circ}\text{C}</math>)</b> | <b>REF</b>       |
|------------------------------------------------------|-------------------------------------------------|----------------------------------------------------------|------------------|
| <b>PSBMA-LM@PDA</b>                                  | <b>0.15</b>                                     | <b>20-60</b>                                             | <b>This work</b> |
| PSBMA-Clay-LiCl                                      | 0.14                                            | -20-10                                                   | [45]             |
| PVA/CA/AgNPs                                         | 0.076                                           | 30-40                                                    | [57]             |
| PVA/PU/Ti <sub>3</sub> C <sub>2</sub> T <sub>x</sub> | 0.0527                                          | 0-30                                                     | [58]             |
| PVA/DMSO/rGO/GO                                      | 0.038                                           | 15-90                                                    | [59]             |
| PVA/Gly/AgNPs@CNT                                    | 0.0299                                          | -20-20                                                   | [60]             |
| PAM-SBMA/TEMPO-CNF-PANI/Gly                          | 0.02                                            | 20-80                                                    | [47]             |
| PANI NFs                                             | 0.0164                                          | 40-110                                                   | [61]             |
| XSBR/SSCNT                                           | 0.0163                                          | 30-100                                                   | [62]             |
| rGO                                                  | 0.013                                           | 25-45                                                    | [63]             |
| CNTs/CB/PVA/Gly                                      | 0.00935                                         | 30-90                                                    | [64]             |

**Table S3.** Water evaporation performance of the PSBMA-LM@PDA-5 hydrogel-based evaporator compared with previous reports under 1 sun.

|                 | <b>Material</b>     | <b>Evaporation rate (kg m<sup>-2</sup> h<sup>-1</sup>)</b> | <b>Efficiency (%)</b> | <b>REF</b>       |
|-----------------|---------------------|------------------------------------------------------------|-----------------------|------------------|
| <b>Hydrogel</b> | <b>PSBMA-LM@PDA</b> | <b>2.54</b>                                                | <b>90.3</b>           | <b>This work</b> |
|                 | PVA/SLS-CNT         | 2.09                                                       | 80.4                  | [69]             |
|                 | Chitosan/PNAGA-CNTs | 2.42                                                       | 92                    | [70]             |
| <b>Coating</b>  | PU/CNT/ZCB          | 2.2                                                        | 93.5                  | [71]             |
|                 | PDMAPS              | 1.9                                                        | 98.8                  | [72]             |
| <b>Aerogel</b>  | APNP                | 1.41                                                       | 87.6                  | [73]             |
|                 | IP-SLC              | 1.29                                                       | 94                    | [74]             |
|                 | rGO-SA-CNT          | 1.622                                                      | 83                    | [75]             |
| <b>Biomass</b>  | Mushroom            | 1.475                                                      | 78                    | [76]             |
|                 | Plasmonic wood      | 1                                                          | 68                    | [77]             |

**Table S4.** Comparison between this work and previously reported representative hydrogels in terms of tensile strength, self-adhesive, self-healing, photothermal, strain sensing, pressure sensing, temperature sensing, and solar evaporation performance.

| Journal                            | Materials                                  | Conduc-<br>tivity<br>(S m <sup>-1</sup> ) | Tensile<br>strength<br>(MPa) | Self-<br>adhesive | Self-<br>healing | Phototh<br>ermal | Strain<br>sensing | Pressure<br>sensing | Tempera<br>ture<br>sensing | Solar<br>evapor<br>ation | REF                  |
|------------------------------------|--------------------------------------------|-------------------------------------------|------------------------------|-------------------|------------------|------------------|-------------------|---------------------|----------------------------|--------------------------|----------------------|
|                                    | <b>PSBMA-<br/>LM@PDA</b>                   | <b>0.45</b>                               | <b>1.3</b>                   | <b>Yes</b>        | <b>Yes</b>       | <b>Yes</b>       | <b>Yes</b>        | <b>Yes</b>          | <b>Yes</b>                 | <b>Yes</b>               | <b>This<br/>work</b> |
| Adv. Funct.<br>Mater               | PM-CNC-<br>PANI-EGaIn                      | 0.0002                                    | 0.11                         | No                | —                | Yes              | Yes               | Yes                 | Yes                        | Yes                      | [78]                 |
| Adv. Funct.<br>Mater               | PAM/PSA-<br>LMGO                           | 0.036                                     | 0.303                        | Yes               | Yes              | —                | Yes               | Yes                 | —                          | —                        | [25]                 |
| Nano<br>Energy                     | PAA-CNF-<br>LMNPs                          | 0.45                                      | 0.12                         | No                | Yes              | —                | Yes               | Yes                 | —                          | —                        | [19]                 |
| ACS nano                           | PSBMA-DA                                   | 0.03                                      | Yes                          | Yes               | Yes              | No               | Yes               | Yes                 | Yes                        | No                       | [4]                  |
| ACS Appl.<br>Mater.<br>Interfaces  | PAA-co-PDP                                 | 1.65                                      | 0.095                        | Yes               | Yes              | No               | Yes               | Yes                 | Yes                        | No                       | [79]                 |
| Adv. Funct.<br>Mater               | Betaine-<br>AgNPs-NaCl-<br>Gly/water       | 0.00485                                   | 7.33                         | No                | —                | No               | Yes               | —                   | Yes                        | No                       | [80]                 |
| Chemical<br>Engineering<br>Journal | PCMCS/PSA-<br>SHA-Bn                       | 4.208                                     | 0.071                        | Yes               | Yes              | No               | Yes               | Yes                 | Yes                        | No                       | [81]                 |
| Chemical<br>Engineering<br>Journal | PAM/PSA-<br>LM/CNTs                        | 94                                        | 0.018                        | Yes               | Yes              | No               | Yes               | —                   | —                          | No                       | [23]                 |
| ACS nano                           | PVA-GO                                     | —                                         | 1.77                         | No                | —                | Yes              | —                 | —                   | —                          | Yes                      | [82]                 |
| Macromol.<br>Mater. Eng.           | PAA-PEDOT                                  | 6.6                                       | 0.78                         | —                 | —                | Yes              | Yes               | Yes                 | —                          | Yes                      | [83]                 |
| Materials<br>Today                 | PNIPAAm-<br>PPy                            | Yes                                       | 0.03                         | —                 | —                | Yes              | Yes               | —                   | —                          | —                        | [84]                 |
| Chemical<br>Engineering<br>Journal | PAM/PAA-<br>[VBIM <sup>+</sup> ]-<br>AuNRs | 10.73                                     | 0.148                        | No                | —                | Yes              | Yes               | Yes                 | Yes                        | —                        | [85]                 |
| Adv. Funct.<br>Mater               | PVA/SA/PAA<br>S                            | —                                         | 0.026                        | —                 | Yes              | Yes              | —                 | —                   | —                          | Yes                      | [86]                 |
| Nano<br>Energy                     | PVA/PHEAA-<br>Sb2S3@PPy-<br>DA             | 2.26                                      | 1.25                         | Yes               | Yes              | Yes              | Yes               | —                   | —                          | —                        | [87]                 |

“—”: Not mentioned in references.
